# Supplementary material for: Changes in Thermal Stress in Korea Using Climate-Based Indicators: Present-Day and Future Projections from 1 km High Resolution Scenarios
Source: MDPI journal article supplement (doi:10.3390/ijerph20176694), 2023-08-31
Supplement: s1 [file s1]

|         |       | 4.0  |      |      |      |      | 5.0  |      |      |      |      |
|---------|-------|------|------|------|------|------|------|------|------|------|------|
|         |       | May  | Jun  | Jul  | Aug  | Sep  | May  | Jun  | Jul  | Aug  | Sep  |
| Korea   | < 28  | 99.8 | 80.0 | 17.8 | 11.9 | 78.5 | 98.5 | 65.3 | 8.8  | 3.0  | 57.9 |
|         | 28-32 | 0.2  | 18.7 | 44.0 | 39.1 | 19.3 | 1.5  | 30.9 | 35.4 | 25.7 | 32.6 |
|         | 32-35 | -    | 1.3  | 31.6 | 38.9 | 2.2  | -    | 3.6  | 37.3 | 41.8 | 8.8  |
|         | 35-40 | -    | -    | 6.6  | 10.1 | -    | -    | 0.3  | 18.4 | 29.1 | 0.7  |
|         | > 40  | -    | -    | -    | -    | -    | -    | -    | 0.1  | 0.3  | -    |
| Seoul   | < 28  | 96.9 | 53.1 | 7.5  | 3.4  | 51.8 | 90.9 | 33.8 | 3.5  | 0.6  | 31.3 |
|         | 28-32 | 3.1  | 37.7 | 30.2 | 22.2 | 37.2 | 8.7  | 47.0 | 19.0 | 10.6 | 41.0 |
|         | 32-35 | -    | 8.5  | 37.5 | 32.2 | 9.0  | 0.4  | 16.2 | 34.1 | 23.9 | 19.2 |
|         | 35-40 | -    | 0.8  | 24.2 | 40.4 | 2.0  | -    | 3.0  | 40.5 | 55.2 | 8.3  |
|         | > 40  | -    | -    | 0.6  | 1.8  | -    | -    | -    | 2.8  | 9.7  | 0.1  |
| Gwangju | < 28  | 97.5 | 54.9 | 4.5  | 1.9  | 46.2 | 91.5 | 36.0 | 1.7  | 0.2  | 26.9 |
|         | 28-32 | 2.5  | 37.7 | 27.5 | 19.3 | 38.3 | 8.1  | 47.9 | 17.1 | 7.5  | 39.0 |
|         | 32-35 | -    | 6.9  | 38.4 | 37.8 | 12.7 | 0.4  | 13.8 | 32.2 | 24.8 | 22.9 |
|         | 35-40 | -    | 0.5  | 29.0 | 40.4 | 2.8  | -    | 2.3  | 46.4 | 61.2 | 11.2 |
|         | > 40  | -    | -    | 0.6  | 0.6  | -    | -    | -    | 2.6  | 6.3  | 0.1  |
| Daegu   | < 28  | 96.9 | 62.9 | 10.4 | 6.1  | 62.7 | 90.4 | 44.7 | 5.2  | 1.0  | 41.7 |
|         | 28-32 | 3.0  | 30.5 | 32.1 | 28.8 | 29.3 | 9.1  | 42.6 | 24.7 | 17.0 | 37.1 |
|         | 32-35 | 0.1  | 6.0  | 34.9 | 36.7 | 7.2  | 0.5  | 10.7 | 31.7 | 31.9 | 16.8 |
|         | 35-40 | -    | 0.7  | 22.1 | 27.9 | 0.8  | -    | 2.0  | 36.6 | 46.5 | 4.4  |
|         | > 40  | -    | -    | 0.5  | 0.5  | -    | -    | -    | 1.7  | 3.7  | -    |
| Daejeon | < 28  | 98.0 | 62.6 | 9.7  | 6.1  | 63.4 | 93.7 | 44.9 | 4.6  | 1.3  | 43.7 |
|         | 28-32 | 1.9  | 31.2 | 34.3 | 28.5 | 29.1 | 6.0  | 42.8 | 24.6 | 15.4 | 35.6 |
|         | 32-35 | -    | 5.7  | 37.6 | 36.7 | 6.5  | 0.3  | 10.6 | 35.4 | 31.3 | 15.8 |
|         | 35-40 | -    | 0.5  | 18.1 | 28.3 | 1.0  | -    | 1.7  | 34.1 | 48.1 | 4.9  |
|         | > 40  | -    | -    | 0.3  | 0.5  | -    | -    | -    | 1.4  | 4.0  | -    |
| Busan   | < 28  | 99.4 | 74.3 | 11.4 | 2.7  | 51.9 | 96.6 | 55.4 | 5.2  | 0.2  | 30.7 |
|         | 28-32 | 0.6  | 23.7 | 35.3 | 25.8 | 38.6 | 3.4  | 38.8 | 27.5 | 12.1 | 43.9 |
|         | 32-35 | -    | 2.0  | 36.3 | 41.4 | 8.9  | -    | 5.5  | 35.3 | 32.8 | 20.7 |
|         | 35-40 | -    | -    | 16.9 | 30.0 | 0.6  | -    | 0.3  | 31.6 | 53.5 | 4.7  |
|         | > 40  | -    | -    | 0.1  | 0.1  | -    | -    | -    | 0.4  | 1.4  | -    |

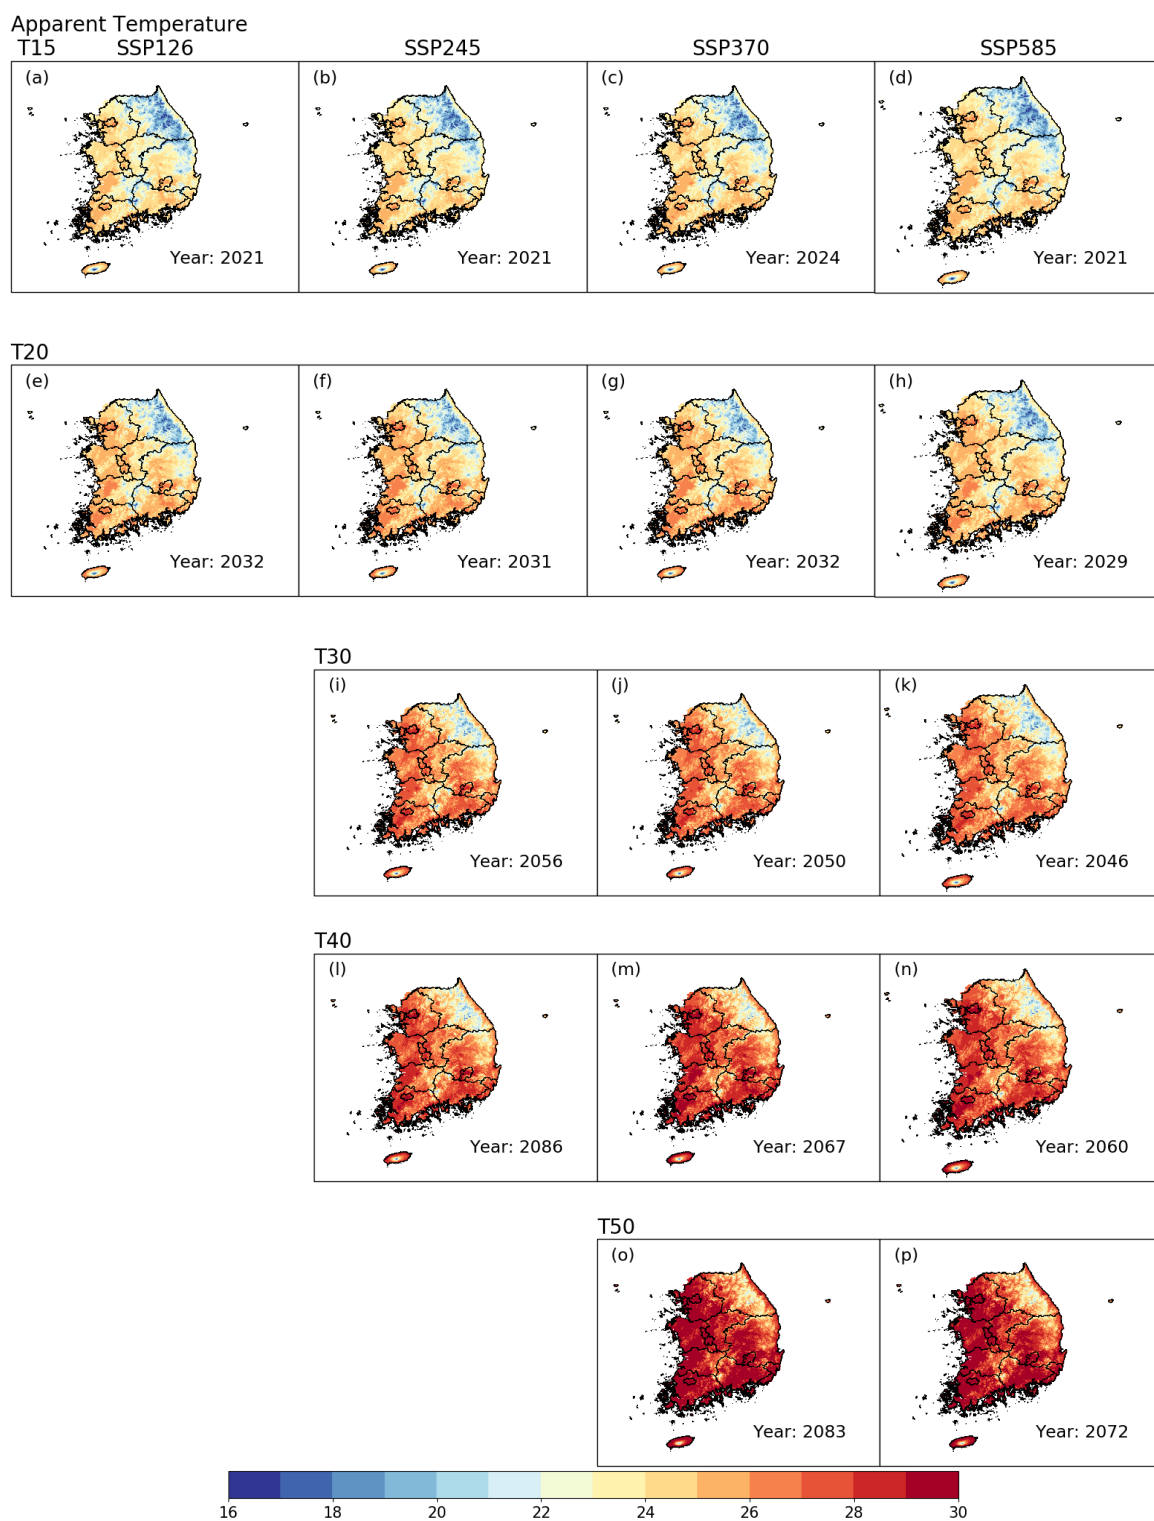

**Figure S1.** Spatial distribution of May to September averaged apparent temperature (AT) for the five GWLs (T15 [first row] to T50 [fifth row]).

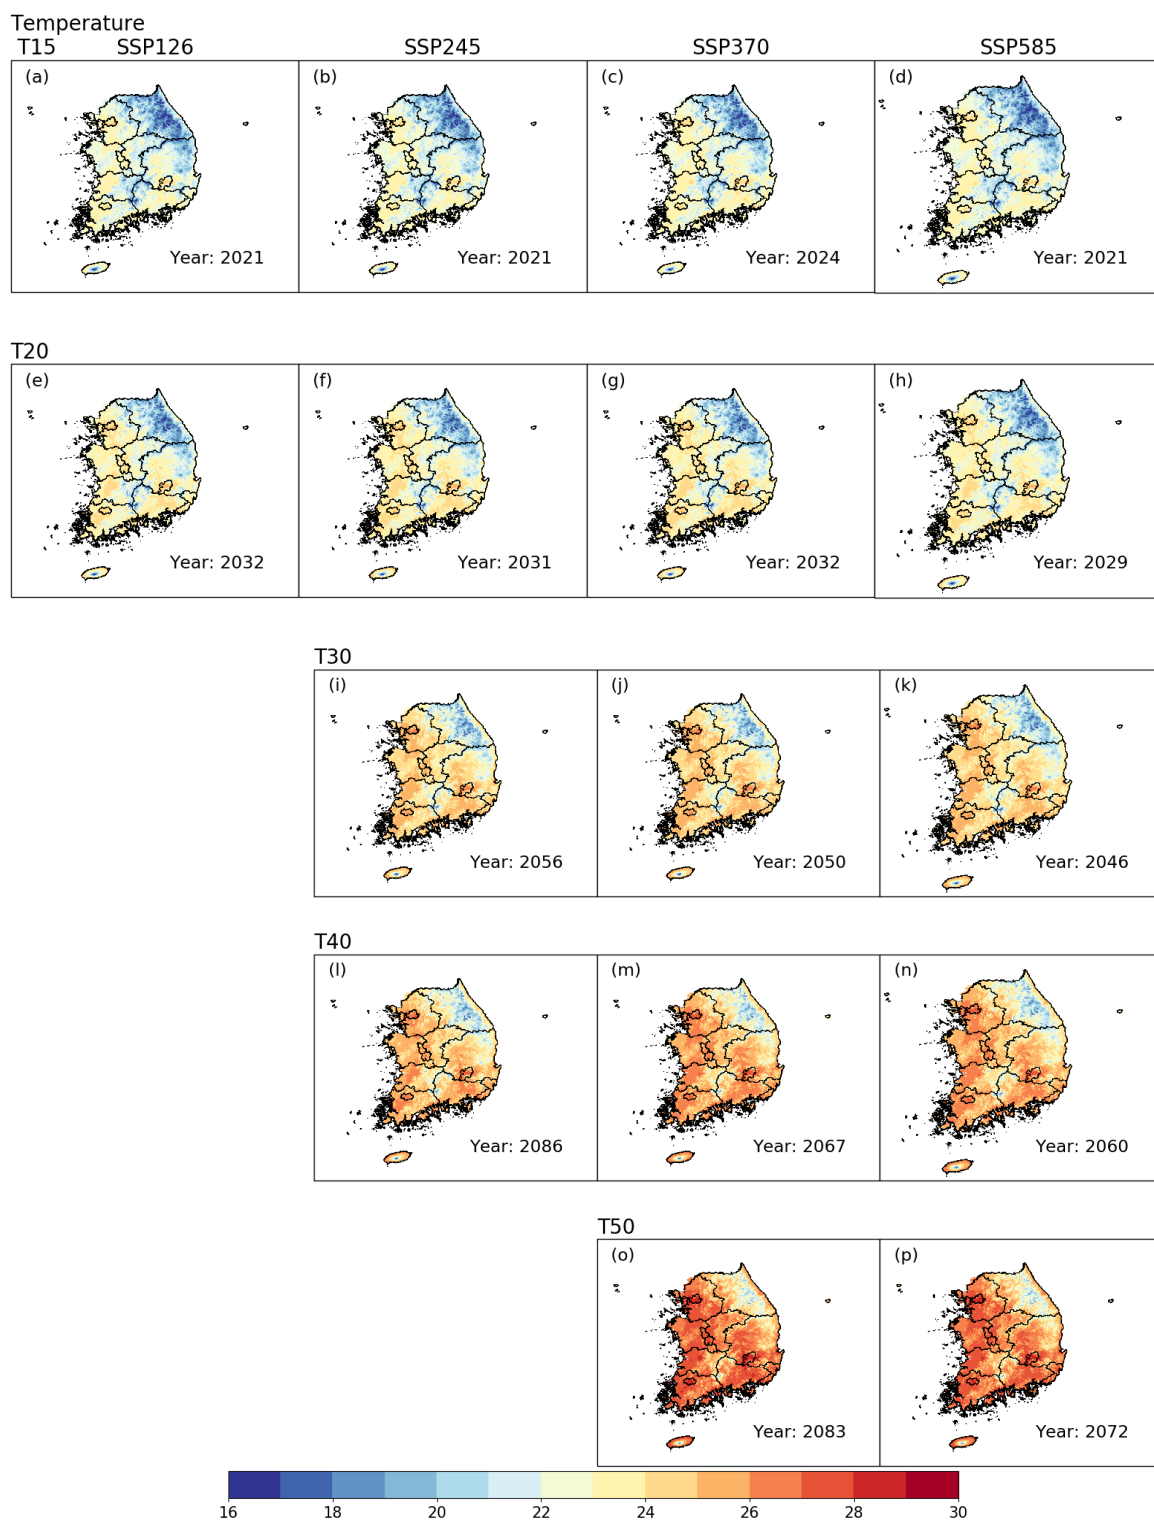

**Figure S2.** Same as Fig. S1 except for temperature (TAS).

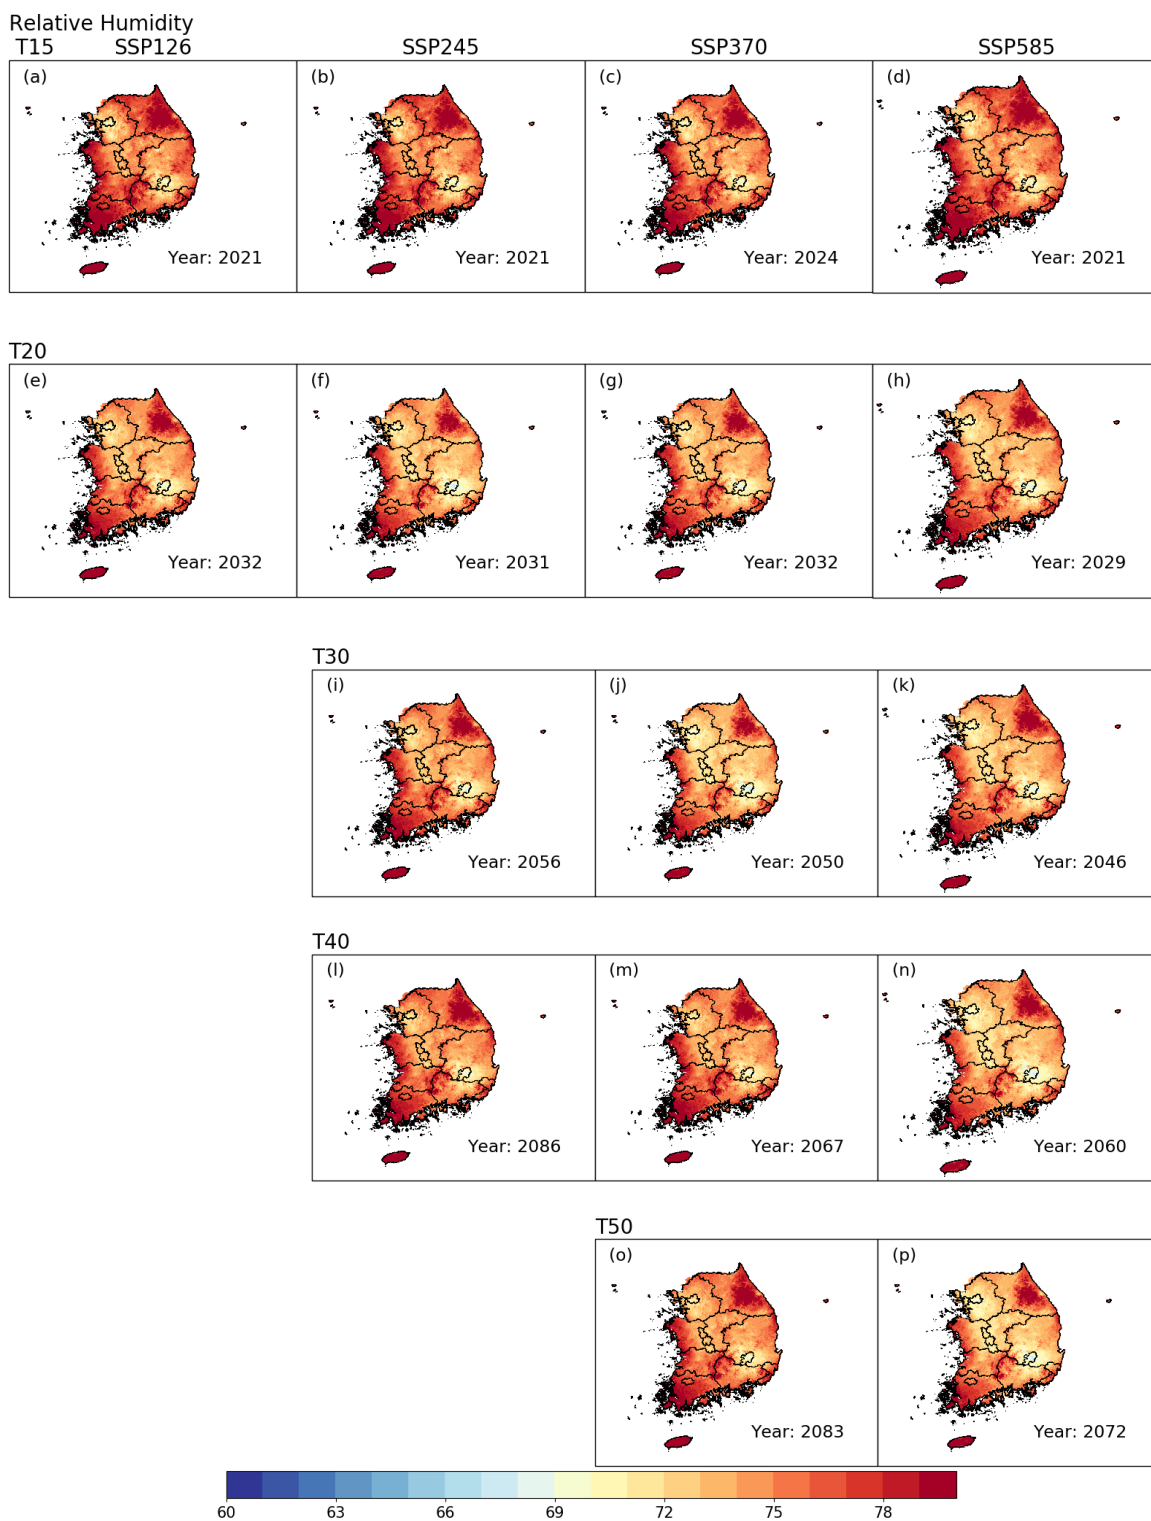

**Figure S3.** Same as Fig. S1 except for relative humidity (RH).
